# Supplementary material
Source: PubMed Central journal article supplement (PMC4942278)
Supplement: NIHMS799516-supplement-Supplemental_Tables.pdf [file NIHMS799516-supplement-Supplemental_Tables.pdf]

## Supplementary Online Content

Charlesworth CJ, Meath THA, Schwartz AL, McConnell KJ. Low-value care in Medicaid and commercially insured populations: a comprehensive single-state analysis. *JAMA Intern Med.* Published online May 31, 2016. doi:10.1001/jamainternmed.2016.2086.

**eTable 1.** Summary of Recommendations and Technical Specifications for Each Low-Value Care Measure

**eTable 2.** Classification of Measures as Higher vs Lower Cost and More vs Less Likely to Occur in the ED

**eTable 3.** Adjusted Odds Ratios and Low-Value Care Risk Differences Associated With Medicaid vs Commercial Insurance Coverage

**eTable 4.** Logistic Regression Models for the Association Between Medicaid Insurance and Low-Value Care by Price Category

**eTable 5.** Logistic Regression Models for the Association Between Medicaid Insurance and Low-Value Care by ED Category

**eTable 6.** Variation in Raw PCSA-Level Low-Value Care Rates by Insurance Type

**eTable 7.** Adjusted Odds Ratios and Low-Value Care Risk Differences Associated With a Medicaid Patient Moving to a PCSA With a 1% Higher Commercial Low-Value Care Rate

**eTable 8a - p.** Full Logistic Regression Model Output for the Association Between Insurance Type and Low-Value Care for Each Measure

**eAppendix.** Methods and Results

**eFigure.** Distribution of Raw Low-Value Care Rates in PCSAs by Insurance Type

**eReferences**

This supplementary material has been provided by the authors to give readers additional information about their work.

**eTable 1:** Summary of recommendations and technical specifications for each low-value care measure

| Measure                                      | Source of Recommendation                                                                                                                                                                                                                                                   | Source of technical specification | Low-value service (numerator definition)                        | Qualifying criteria (denominator definition)                                                                                                                                                                                                                                                                                                                                                                                                                                                                                                                                                                                                                                                               | Continuous Enrollment criteria |
|----------------------------------------------|----------------------------------------------------------------------------------------------------------------------------------------------------------------------------------------------------------------------------------------------------------------------------|-----------------------------------|-----------------------------------------------------------------|------------------------------------------------------------------------------------------------------------------------------------------------------------------------------------------------------------------------------------------------------------------------------------------------------------------------------------------------------------------------------------------------------------------------------------------------------------------------------------------------------------------------------------------------------------------------------------------------------------------------------------------------------------------------------------------------------------|--------------------------------|
| Abdomen CT Combined Studies                  | CMS<br><br>“The intent of this measure is to assess questionable utilization of contrast agents and unnecessary radiation exposure that carries an element of patient risk and significantly increases diagnostic costs, with limited value for clinical decision making.” | QualityNet                        | Abdomen/Pelvis CT with and without contrast (CPT: 74170, 74178) | <p><b>Inclusion</b><br/>All Abdomen/Pelvis CTs (CPT: 74150, 74160, 74170, 74176, 74177, 74178 )</p> <p><b>Exclusion</b><br/><b>ICD-9:</b> 593.9 (kidney unspec); 599.0, 599.9, 595.xx, 597.xx (urinary disease); 120.0, 599.70, 599.71, 599.72 (hematuria); 250.8x, 251.0, 251.1, 251.2, 270.3, 577.0, 577.1 (pancreatic); 255.9, 194.xx, 237.xx, 227.xx (adrenal mass); 155.0, 155.1, 155.2, 197.7, 209.72, 211.5, 230.8, 235.3 (liver lesion); 188.x, 233.7 (bladder neoplasm); 157.0, 157.1, 157.2, 157.3, 157.4, 157.8, 157.9, 189.0, 211.6, 211.7, 223.0 (pancreas neoplasm); 863.xx-- 869.xx, 902.xx, 929.x (blunt abdominal trauma); 590.1x, 590.8x, 590.9 (kidney infection); 782.4 (jaundice)</p> | None                           |
| Arthroscopic Surgery for Knee Osteoarthritis | NICE<br><br>“Do not refer for                                                                                                                                                                                                                                              | Schwartz                          | Knee arthroscopy with chondroplasty (CPT: 29877 29879 29880     | <p><b>Inclusion</b><br/>Chondromalacia, Osteoarthritis</p>                                                                                                                                                                                                                                                                                                                                                                                                                                                                                                                                                                                                                                                 | None                           |

|                                           |                                                                                                                                                                                                                                                                                                                        |            |                                                                      |                                                                                                                                                                                                                                                                                                                                                                               |                      |
|-------------------------------------------|------------------------------------------------------------------------------------------------------------------------------------------------------------------------------------------------------------------------------------------------------------------------------------------------------------------------|------------|----------------------------------------------------------------------|-------------------------------------------------------------------------------------------------------------------------------------------------------------------------------------------------------------------------------------------------------------------------------------------------------------------------------------------------------------------------------|----------------------|
|                                           | arthroscopic lavage and debridement as part of treatment for osteoarthritis, unless the person has knee osteoarthritis with a clear history of mechanical locking (as opposed to morning joint stiffness, 'giving way' or X-ray evidence of loose bodies)"                                                             |            | 29881 G0289)                                                         | (ICD-9: 7177<br>73392 71500<br>71509 71510<br>71516 71526<br>71536 71596 )<br><br><b>Exclusion</b><br>Meniscal tear<br>(ICD-9: 8360-<br>8362 7170<br>71741)                                                                                                                                                                                                                   |                      |
| Simultaneous Brain & Sinus CT             | CMS<br><br>"Simultaneous CT sinus and brain imaging for headache without suspected complications is generally considered inappropriate ....performing both procedures is duplicative and results in inefficiency and lower quality care... there may [also] be safety concerns to the patient in undergoing two scans" | QualityNet | Sinus CT on the same date as Brain CT<br>(CPT: 70486, 70487, 70488 ) | <b>Inclusion</b><br>Brain CT (CPT: 70450, 70460, 70470;<br><br><b>Exclusion</b><br>ICD-9: 140-239 (neoplasms), 800-839,850-854,860-869,905-909, 926.11, 926.12, 929, 952, 958-959 (trauma), 376.01 (orbital cellulitis), 324.0 (intracranial abscess)                                                                                                                         | None                 |
| CT for acute uncomplicated rhinosinusitis | Choosing Wisely<br><br>"Don't order sinus computed tomography (CT) or indiscriminately prescribe antibiotics for uncomplicated acute rhinosinusitis"                                                                                                                                                                   | Schwartz   | CT of maxillofacial area<br>(CPT: 70486-70488)                       | <b>Inclusion</b><br>Sinusitis (ICD-9: 461x 473x)<br><br><b>Exclusions</b><br>ICD-9: 2770x 042 07953 279xx (immune disorders), 471x (nasal polyp) 373xx 37600 (eyelid/orbit inflammation), 800xx-804xx 850xx-854xx 870xx-873xx 9590x 910xx 920xx-921xx (head or face trauma)<br><br><b>Other exclusions:</b><br>Chronic sinusitis , defined by presence of sinusitis diagnosis | 10 of last 12 months |

|                                         |                                                                               |          |                                                                             |                                                                                                                                                                                                                                                                                                                                                                                                                                                                                                                                                      |                                     |
|-----------------------------------------|-------------------------------------------------------------------------------|----------|-----------------------------------------------------------------------------|------------------------------------------------------------------------------------------------------------------------------------------------------------------------------------------------------------------------------------------------------------------------------------------------------------------------------------------------------------------------------------------------------------------------------------------------------------------------------------------------------------------------------------------------------|-------------------------------------|
|                                         |                                                                               |          |                                                                             | between 30 and 365 days prior to imaging                                                                                                                                                                                                                                                                                                                                                                                                                                                                                                             |                                     |
| Electroencephalogram for Headaches      | Choosing Wisely<br>“Don’t perform electroencephalography (EEG) for headaches” | Schwartz | Electroencephalogram (CPT: 95812 95813 95816 95819 95822 95827 95830 95957) | <b>Inclusion</b><br>Headaches (ICD-9: 30781 339xx 346x 7840)<br><br><b>Exclusions</b><br>ICD-9: 345xx 7803x 7810 (epilepsy or convulsions)<br><br><b>Other Exclusions</b><br>Epilepsy or convulsions diagnosis during 1 year prior                                                                                                                                                                                                                                                                                                                   | 10 of last 12 months prior to visit |
| Head Imaging for Uncomplicated Headache | Choosing Wisely<br>“Don’t do imaging for uncomplicated headache”              | Schwartz | CT or MRI of head or brain (CPT: 70450 70460 70470 70551-70553)             | <b>Inclusion</b><br>Headache or migraine (ICD-9: 30781 339xx 346x 7840)<br><br><b>Exclusions</b><br>ICD-9: 33920-33922 33943 (post-traumatic or thunderclap headache), 14xx-208xx 230xx-239xx (cancer), 3463x 3466x (migraine with hemiplegia or infarction), 4465 (giant cell arteritis), 345xx 7803x (epilepsy or convulsions), 43xx (cerebrovascular diseases, including stroke/TIA and subarachnoid hemorrhage), 800xx-804xx 850xx-854xx 870xx-873xx 9590x 910xx 920xx-921xx (head or face trauma), 78097 781xx 7820 7845x 79953 (altered mental | None                                |

|                                                         |                                                                                                                                                           |          |                                                                    |                                                                                                                                                                                                                                                                                                                                                                                                                                                                                                                        |                                |
|---------------------------------------------------------|-----------------------------------------------------------------------------------------------------------------------------------------------------------|----------|--------------------------------------------------------------------|------------------------------------------------------------------------------------------------------------------------------------------------------------------------------------------------------------------------------------------------------------------------------------------------------------------------------------------------------------------------------------------------------------------------------------------------------------------------------------------------------------------------|--------------------------------|
|                                                         |                                                                                                                                                           |          |                                                                    | status, nervous and musculoskeletal system symptoms, including gait abnormality, meningismus, disturbed skin sensation, speech deficits), V1254 V10xx (personal history of stroke/TIA or cancer)                                                                                                                                                                                                                                                                                                                       |                                |
| Head Imaging for Syncope                                | Choosing Wisely, NICE<br><br>“In the evaluation of simple syncope and a normal neurological examination, don’t obtain brain imaging studies (CT or MRI).” | Schwartz | CT or MRI of head or brain<br>(CPT: 70450 70460 70470 70551-70553) | <b>Inclusion</b><br>Syncope (ICD-9: 7802 9921)<br><br><b>Exclusion:</b><br>ICD-9: 345xx 7803x (epilepsy or convulsions), 43xx (cerebrovascular diseases, including stroke/TIA and subarachnoid hemorrhage), 800xx-804xx 850xx-854xx 870xx-873xx 9590x 910xx 920xx-921xx (head or face trauma), 78097 781xx 7820 7845x (altered mental status, nervous and musculoskeletal system symptoms, including gait abnormality, meningismus, disturbed skin sensation, speech deficits), V1254 (personal history of stroke/TIA) | None                           |
| Total or Free T3 Tests for Patients with Hypothyroidism | Choosing Wisely<br><br>“Don’t order a total or free T3 level when assessing                                                                               | Schwartz | Total or free T3<br>(CPT: 84480 84481)                             | <b>Inclusion</b><br>Acquired hypothyroidism (ICD9: 244.0, 244.1, 244.2,                                                                                                                                                                                                                                                                                                                                                                                                                                                | 10 of 12 months prior to visit |

|                                        |                                                                                                     |          |                                                                                                                                                                   |                                                                                                                                                                                                                                                                                                                                                                                                                                                                                                                                                                                                                                                                                                                               |                                                                 |
|----------------------------------------|-----------------------------------------------------------------------------------------------------|----------|-------------------------------------------------------------------------------------------------------------------------------------------------------------------|-------------------------------------------------------------------------------------------------------------------------------------------------------------------------------------------------------------------------------------------------------------------------------------------------------------------------------------------------------------------------------------------------------------------------------------------------------------------------------------------------------------------------------------------------------------------------------------------------------------------------------------------------------------------------------------------------------------------------------|-----------------------------------------------------------------|
|                                        | levothyroxine (T4) dose in hypothyroid patients”                                                    |          |                                                                                                                                                                   | 244.3, 244.8, 244.9) in addition to history of acquired hypothyroidism (diagnosis during previous 1 year)                                                                                                                                                                                                                                                                                                                                                                                                                                                                                                                                                                                                                     |                                                                 |
| Imaging for Non-specific Low Back Pain | Choosing Wisely, NICE<br>“Don’t obtain imaging studies in patients with non-specific low back pain” | Schwartz | Radiologic, CT, and MRI imaging of spine (CPT: 72010 72020 72052 72100 72110 72114 72120 72200 72202 72220 72131-72133 72141 72142 72146-72149 72156 72157 72158) | <p><b>Inclusion</b><br/>Low back pain (ICD-9: 7213 72190 72210 72252 7226 72293 72402 7242-7246 72470 72471 72479 7385 7393 7394 846x 8472 ), occurring within 6 weeks of initial low back pain diagnosis. Initial diagnosis is defined as the earliest low back pain claim in 2013, and must have no 1 year history of low back pain.</p> <p><b>Exclusion</b><br/>14xx–208xx<br/>230xx-239xx (cancer), 800x-839xx 850xx-854xx 86xxx<br/>905xx-909xx<br/>92611 92612<br/>929, 952xx<br/>958xx-959xx (trauma), 3040x-3042x 3044x<br/>3054x-3057x (IV drug abuse),<br/>34460 7292x (neurologic impairment),<br/>4210 4211 4219 (endocarditis),<br/>038xx (septicemia),<br/>01xxx (tuberculosis),<br/>730xx (osteomyelitis),</p> | 10 of last 12 months at time of initial low back pain diagnosis |

|                                               |                                                                                                                                                             |          |                                                                                                                                                                                                   |                                                                                                                                                                                                                                                                                                           |                                                                                       |
|-----------------------------------------------|-------------------------------------------------------------------------------------------------------------------------------------------------------------|----------|---------------------------------------------------------------------------------------------------------------------------------------------------------------------------------------------------|-----------------------------------------------------------------------------------------------------------------------------------------------------------------------------------------------------------------------------------------------------------------------------------------------------------|---------------------------------------------------------------------------------------|
|                                               |                                                                                                                                                             |          |                                                                                                                                                                                                   | 7806x 7830x<br>7832x 78079<br>7808x 2859x<br>(fever, weight<br>loss, malaise,<br>night sweats,<br>anemia not due<br>to blood loss)<br>72142 72191<br>72270 72273<br>7244<br>(myelopathy,<br>neuritis and<br>radiculopathy )                                                                               |                                                                                       |
| Imaging for Diagnosis<br>of Plantar Fasciitis | Choosing Wisely<br><br>“Don’t routinely order<br>X-ray for diagnosis of<br>plantar fasciitis/heel<br>pain in employees who<br>stand or walk at<br>work.”    | Schwartz | Radiographic, MRI, or<br>ultrasound imaging<br>(CPT:73620 73630<br>73650 73718 73719<br>73720 76880 76881<br>76882)                                                                               | <b>Inclusion</b><br>Plantar fasciitis<br>(ICD-9: 72871<br>7294), occurring<br>within 2 weeks<br>of initial plantar<br>fasciitis<br>diagnosis. Initial<br>diagnosis is<br>defined as the<br>earliest plantar<br>fasciitis claim in<br>2013, and must<br>have no 1 year<br>history of<br>plantar fasciitis. | 10 of last 12<br>months at<br>time of<br>initial<br>plantar<br>fasciitis<br>diagnosis |
| Pre-operative Chest<br>Radiography            | Choosing Wisely<br><br>“Don’t obtain<br>preoperative chest<br>radiography in the<br>absence of a clinical<br>suspicion for<br>intrathoracic<br>pathology”   | Schwartz | Chest x-ray occurring<br>within 30 days prior to<br>surgery<br>(CPT: 71010 71015<br>71020-71023 71030<br>71034 71035).<br>Excludes services<br>occurring in<br>inpatient/emergency<br>setting**   | <b>Inclusion</b><br>Low or<br>intermediate risk<br>non<br>-cardiothoracic<br>surgery (BETOS:<br>P1x P3D P4A P4B<br>P4C P5C P5D<br>P8A P8G) or<br>relevant surgical<br>code not<br>included in<br>BETOS<br>categories (CPT:<br>19120 19125<br>47562 47563<br>49560 58558)                                  | Enrolled<br>during<br>month prior<br>to surgery                                       |
| Pre-operative<br>Echocardiography             | Choosing Wisely<br><br>“Avoid<br>echocardiograms for<br>pre/peri-operative<br>assessment of patients<br>with no history or<br>symptoms of heart<br>disease” | Schwartz | Echocardiogram<br>occurring within 30<br>days prior to surgery<br>(CPT: 93303 93304<br>93306-93308 93312<br>93315 93318)<br>Excludes services<br>occurring in<br>inpatient/emergency<br>setting** | <b>Exclusion</b><br>Surgeries<br>occurring in<br>inpatient or<br>Emergency<br>setting**                                                                                                                                                                                                                   |                                                                                       |
| Pre-operative Stress<br>Testing               | Choosing Wisely<br><br>“Patients who have no<br>cardiac history and<br>good functional status<br>do not require<br>preoperative stress                      | Schwartz | Stress<br>electrocardiogram,<br>echocardiogram,<br>nuclear medicine<br>imaging, cardiac MRI<br>or CT angiography<br>occurring within 30                                                           |                                                                                                                                                                                                                                                                                                           |                                                                                       |

|                                                |                                                                                                                                                            |          |                                                                                                                                                                                                                                                                                                 |                                                                                                                                                                                                                                                                                                                                                                                                                               |                                                 |
|------------------------------------------------|------------------------------------------------------------------------------------------------------------------------------------------------------------|----------|-------------------------------------------------------------------------------------------------------------------------------------------------------------------------------------------------------------------------------------------------------------------------------------------------|-------------------------------------------------------------------------------------------------------------------------------------------------------------------------------------------------------------------------------------------------------------------------------------------------------------------------------------------------------------------------------------------------------------------------------|-------------------------------------------------|
|                                                | testing prior to non-cardiac thoracic surgery”                                                                                                             |          | days prior to surgery<br>(CPT: 75552-75564<br>75574 78451-78454<br>78460 78461 78464<br>78465 78472 78473<br>78481 78483 78491<br>78492 93015-93018<br>93350 93351 0146T<br>0147T 0148T 0149T)<br>Excludes services<br>occurring in<br>inpatient/emergency<br>setting**                         |                                                                                                                                                                                                                                                                                                                                                                                                                               |                                                 |
| Pre-operative<br>Pulmonary Function<br>Testing | Choosing Wisely<br><br>“Prior to cardiac<br>surgery, there is no<br>need for pulmonary<br>function testing in the<br>absence of respiratory<br>symptoms”   | Schwartz | Spirometry (CPT:<br>94010 )<br><br>Excludes services<br>occurring in<br>inpatient/emergency<br>setting**                                                                                                                                                                                        | <b>Inclusion</b><br>Low or<br>intermediate risk<br>non-<br>cardiothoracic<br>surgery (BETOS:<br>P1x P2x P3D P4A<br>P4B P4C P5C P5D<br>P8A P8G<br>(selected<br>surgeries)<br><br><b>Exclusion</b><br>Surgeries<br>occurring in<br>inpatient or<br>Emergency<br>setting**                                                                                                                                                       | Enrolled<br>during<br>month prior<br>to surgery |
| Spinal Injections for<br>Low Back Pain         | Literature<br><br>Pinto (2012) Epidural<br>corticosteroid<br>injections in the<br>management of<br>sciatica: A systematic<br>review and meta-<br>analysis* | Schwartz | Epidural (not<br>indwelling), facet, or<br>trigger point injections<br>(CPT: 62311 64483<br>20552 20553 64493<br>64475)<br><br>Excludes injections<br>associated with an<br>inpatient stay (defined<br>as injections occurring<br>within the 14 day<br>period following an<br>inpatient stay**) | <b>Inclusion</b><br>Backpain (ICD-9:<br>7213 72190<br>72210 7222<br>72252 7226<br>72280 72283<br>72293 72400<br>72402 72403<br>7242 7245 7246<br>72470 72471<br>72479 7384<br>7385 7393 7394<br>75612 8460-<br>8463 8468 8469<br>8472)<br><br><b>Exclusion</b><br>Back pain with<br>radiculopathy<br>(ICD-9: 72142<br>72191 72270<br>72273 7243<br>7244)<br><br><b>Other exclusion</b><br>Backpain visits<br>that occurred in | Enrolled<br>during<br>month prior<br>to visit   |



|                            |                                                                                                                                                                                                                                                                                         |            |                                                    |                                                                                                                                                                                                                   |      |
|----------------------------|-----------------------------------------------------------------------------------------------------------------------------------------------------------------------------------------------------------------------------------------------------------------------------------------|------------|----------------------------------------------------|-------------------------------------------------------------------------------------------------------------------------------------------------------------------------------------------------------------------|------|
|                            |                                                                                                                                                                                                                                                                                         |            |                                                    | an inpatient setting**                                                                                                                                                                                            |      |
| Thorax CT Combined Studies | Quality net/CMS<br><br>“The indiscriminate use of combined thorax CT studies— defined as those that are performed both without and with contrast agents for the evaluation of solid organs and body cavities— represents a serious inefficiency of practice and a patient safety issue” | QualityNet | Thorax CTs with and without contrast (CPT: 71270 ) | <b>Inclusion</b><br>All Thorax CTs (CPT: 71250, 71260, 71270)<br><br><b>Exclusion</b><br>ICD-9: 860.xx-869.xx (chest/abd/pelvis injury);<br>901.xx-902.xx (injury blood vessels);<br>926.xx, 929.x (crush injury) | None |

Notes: CT= computed tomography; Choosing Wisely is an initiative of the ABIM Foundation, a charity that aims to advance medical professionalism to improve health care quality. The Choosing Wisely initiative creates clinical guidelines to promote conversations between patients and physicians about appropriate care, and reduce waste. In partnership with Consumer Reports, corresponding patient resources are also available. More information can be found at <http://www.choosingwisely.org/about-us/> ;

The National Institute for Health and Care Excellence (NICE) is a non-departmental public body based in the United Kingdom; it is affiliated with the Department of Health but operates independently of government. NICE provides guidance about effective, high-value healthcare through several methods, including clinical guidelines. More information is available at <https://www.nice.org.uk/about>;

QualityNet was established by the Centers for Medicare & Medicaid Services to facilitate the exchange of quality improvement resources, such as technical specifications for quality measures. More information is available at <http://www.qualitynet.org>

\* For additional lit review sources, see <http://onlinelibrary.wiley.com/doi/10.1002/14651858.CD001824.pub3/abstract> (Epidural, trigger point and facet injections, Cochrane 2008), <http://www.ncbi.nlm.nih.gov/pubmed/19363457> (intradiscal injections, American Pain Society), [http://journals.lww.com/spinejournal/Abstract/2013/11010/Effect\\_of\\_Facet\\_Joint\\_Injection\\_Versus\\_Systemic.4.aspx](http://journals.lww.com/spinejournal/Abstract/2013/11010/Effect_of_Facet_Joint_Injection_Versus_Systemic.4.aspx) (facet injections, Spine)

\*\* based on HEDIS 2014 definitions of inpatient and emergency care claims

**eTable 2:** Classification of measures as higher vs lower cost, and more vs less likely to occur in the ED

| Measure                                                 | Price Category | ED Category |
|---------------------------------------------------------|----------------|-------------|
| Abdomen CT Combined Studies                             | Higher         | Less likely |
| Arthroscopic Surgery for Knee Osteoarthritis            | Higher         | Less likely |
| Simultaneous Brain & Sinus CT                           | Higher         | Less likely |
| CT for acute uncomplicated rhinosinusitis               | Higher         | Less likely |
| Electroencephalogram for Headaches                      | Higher         | Less likely |
| Head Imaging for Uncomplicated Headache                 | Higher         | More likely |
| Head Imaging for Syncope                                | Higher         | More likely |
| Total or Free T3 Tests for Patients with Hypothyroidism | Lower          | Less likely |
| Imaging for Non-specific Low Back Pain                  | Lower          | More likely |
| Imaging for Diagnosis of Plantar Fasciitis              | Lower          | Less likely |
| Pre-operative Chest Radiography                         | Lower          | Less likely |
| Pre-operative Echocardiography                          | Higher         | Less likely |
| Pre-operative Stress Testing                            | Higher         | Less likely |
| Pre-operative Pulmonary Function Testing                | Lower          | Less likely |
| Spinal Injections for Low Back Pain                     | Higher         | Less likely |
| Thorax CT Combined Studies                              | Higher         | Less likely |

**eTable 3:** Adjusted odds ratios and low-value care risk differences associated with Medicaid versus commercial insurance coverage.

| Measure                                      | Odds ratio <sup>a</sup><br>[95% CI] | p-value | Risk difference <sup>b</sup> (%)<br>[95% CI] | p-value |
|----------------------------------------------|-------------------------------------|---------|----------------------------------------------|---------|
| Imaging for non-specific low back pain       | 1.57 [1.51, 1.64]                   | <0.001  | 6.9 [6.2, 7.6]                               | <0.001  |
| Head imaging for uncomplicated headache      | 1.68 [1.60, 1.76]                   | <0.001  | 6.1 [5.5, 6.7]                               | <0.001  |
| Head imaging for syncope                     | 1.52 [1.32, 1.74]                   | <0.001  | 4.1 [2.6, 5.5]                               | <0.001  |
| Imaging for plantar fasciitis                | 0.61 [0.51, 0.72]                   | <0.001  | -6.3 [-8.2, -4.3]                            | <0.001  |
| T3 tests for hypothyroidism                  | 0.59 [0.53, 0.65]                   | <0.001  | -5.9 [-6.8, -5.0]                            | <0.001  |
| Preoperative chest radiography               | 2.07 [1.87, 2.29]                   | <0.001  | 3.7 [3.1, 4.3]                               | <0.001  |
| Abdomen CT combined studies                  | 0.74 [0.67, 0.82]                   | <0.001  | -1.6 [-2.1, -1.1]                            | <0.001  |
| Simultaneous Brain and Sinus CT              | 1.31 [1.12, 1.55]                   | 0.001   | 1.0 [0.4, 1.6]                               | 0.001   |
| CT for uncomplicated acute rhinosinusitis    | 1.04 [0.92, 1.18]                   | 0.51    | 0.1 [-0.2, 0.5]                              | 0.518   |
| Arthroscopic surgery for knee osteoarthritis | 0.56 [0.47, 0.67]                   | <0.001  | -2.0 [-2.5, -1.5]                            | <0.001  |
| Thorax CT combined studies                   | 1.73 [1.26, 2.36]                   | 0.001   | 0.8 [0.3, 1.3]                               | 0.002   |
| Preoperative echocardiography                | 1.53 [1.17, 2.00]                   | 0.002   | 0.2 [0.1, 0.4]                               | 0.008   |
| Spinal injections for low back pain          | 0.37 [0.33, 0.42]                   | <0.001  | -1.2 [-1.3, -1.1]                            | <0.001  |
| Preoperative stress testing                  | 2.28 [1.56, 3.27]                   | <0.001  | 0.3 [0.1, 0.4]                               | 0.001   |
| Preoperative pulmonary function testing      | 1.74 [1.15, 2.58]                   | 0.007   | 0.2 [0.0, 0.3]                               | 0.026   |
| Electroencephalogram for headache            | 2.13 [1.44, 3.12]                   | <0.001  | 0.1 [0.1, 0.2]                               | 0.002   |

a. Estimates are presented for Medicaid insurance. Reference group is commercial insurance. Models adjusted for patient age, sex, rural or urban residence, and Charlson Comorbidity Index.

b. Risk differences were calculated from logistic regression models, as the predicted probability of receiving low-value care with Medicaid insurance, minus the predicted probability of receiving low-value care with commercial insurance, for the average qualifying patient.

**eTable 4:** Logistic regression models for the association between Medicaid insurance and low-value care, by price category

| Price Category       |                       | p-value<br>for interaction |
|----------------------|-----------------------|----------------------------|
| Lower<br>OR [95% CI] | Higher<br>OR [95% CI] |                            |
| 1.33 [1.29, 1.38]    | 1.32 [1.28, 1.36]     | 0.64                       |

*Notes:* Reference group is commercial insurance.

Models adjusted for age, sex, Charlson Comorbidity Index, and rural or urban residence.

Errors were clustered by patient to account for correlation among patients who qualified for multiple measures.

Lower priced services include: Total or Free T3 Tests for Patients with Hypothyroidism, Imaging for Non-specific Low Back Pain, Imaging for Diagnosis of Plantar Fasciitis, Pre-operative Chest Radiography, and Pre-operative Pulmonary Function Testing.

Higher priced services include: Abdomen CT Combined Studies, Arthroscopic Surgery for Knee Osteoarthritis, Simultaneous Brain & Sinus CT, CT for acute uncomplicated rhinosinusitis, Electroencephalogram for Headaches, Head Imaging for Uncomplicated Headache, Head Imaging for Syncope, Pre-operative Echocardiography, Pre-operative Stress Testing, Spinal Injections for Low Back Pain, and Thorax CT Combined Studies

**eTable 5:** Logistic regression models for the association between Medicaid insurance and low-value care, by ED category

| ED Category                |                            | p-value<br>for interaction |
|----------------------------|----------------------------|----------------------------|
| Less likely<br>OR [95% CI] | More likely<br>OR [95% CI] |                            |
| 0.78 [0.75, 0.81]          | 1.57 [1.52, 1.62]          | < 0.001                    |

*Notes:* Reference group is commercial insurance.

Models adjusted for: age, sex, Charlson Comorbidity Index, and rural or urban residence.

Errors were clustered by patient to account for correlation among patients who qualified for multiple measures.

Services less likely to occur in the ED include: Abdomen CT Combined Studies, Arthroscopic Surgery for Knee Osteoarthritis, Simultaneous Brain & Sinus CT, CT for acute uncomplicated rhinosinusitis, Electroencephalogram for Headaches, Total or Free T3 Tests for Patients with Hypothyroidism, Imaging for Diagnosis of Plantar Fasciitis, Pre-operative Chest Radiography, Pre-operative Echocardiography, Pre-operative Stress Testing, Pre-operative Pulmonary Function Testing, Spinal Injections for Low Back Pain, and Thorax CT Combined Studies.

Services more likely to occur in the ED include: Head Imaging for Uncomplicated Headache, Head Imaging for Syncope, and Imaging for Non-specific Low Back Pain.

**eTable 6:** Variation in raw PCSA-level low-value care rates, by insurance type

| Measure                                      | PCSA-level low-value care rates |                 |
|----------------------------------------------|---------------------------------|-----------------|
|                                              | Commercial<br>IQR               | Medicaid<br>IQR |
| Imaging for non-specific low back pain       | 5.6%                            | 8.5%            |
| Head imaging for uncomplicated headache      | 4.7%                            | 8.7%            |
| Head imaging for syncope                     | 11.6%                           | 18.9%           |
| Imaging for plantar fasciitis                | 16.0%                           | 17.3%           |
| T3 tests for hypothyroidism                  | 10.0%                           | 13.9%           |
| Preoperative chest radiography               | 4.0%                            | 10.2%           |
| Abdomen CT combined studies                  | 4.7%                            | 6.7%            |
| Simultaneous Brain and Sinus CT              | 4.4%                            | 5.7%            |
| CT for uncomplicated acute rhinosinusitis    | 2.8%                            | 3.9%            |
| Arthroscopic surgery for knee osteoarthritis | 6.0%                            | 4.1%            |
| Spinal injections for low back pain          | 1.6%                            | 1.4%            |

Notes: IQR= Interquartile range. Displayed low-value services are those that met the threshold for inclusion in geographic analyses. Rates are unsmoothed.

**eTable7:** Adjusted odds ratios and low-value care risk differences associated with a Medicaid patient moving to a PCSA with a 1% higher commercial low-value care rate.

| Measure                                      | Odds ratio <sup>a</sup><br>[95% CI] | p-value | Risk difference <sup>b</sup><br>(%)<br>[95% CI] | p-value |
|----------------------------------------------|-------------------------------------|---------|-------------------------------------------------|---------|
| Imaging for non-specific low back pain       | 1.05 [1.03, 1.07]                   | < 0.001 | 0.8 [0.5, 1.2]                                  | <0.001  |
| Head imaging for uncomplicated headache      | 1.04 [1.01, 1.08]                   | 0.011   | 0.6 [-0.2, 1.4]                                 | 0.130   |
| Head imaging for syncope                     | 0.94 [0.53, 1.69]                   | 0.832   | -0.8 [-7.1, 5.6]                                | 0.814   |
| Imaging for plantar fasciitis                | 1.03 [1.00, 1.06]                   | 0.074   | 0.3 [0, 0.6]                                    | 0.080   |
| T3 tests for hypothyroidism                  | 1.08 [1.06, 1.10]                   | <0.001  | 0.7 [0.5, 0.9]                                  | <0.001  |
| Preoperative chest radiography               | 1.19 [1.10, 1.30]                   | <0.001  | 1.3 [0.6, 2.1]                                  | 0.001   |
| Abdomen CT combined studies                  | 1.23 [1.07, 1.42]                   | 0.004   | 0.9 [0.1, 1.6]                                  | 0.029   |
| Simultaneous Brain and Sinus CT              | 1.33 [0.67, 2.60]                   | 0.409   | 1.1 [-2.4, 4.7]                                 | 0.534   |
| CT for uncomplicated acute rhinosinusitis    | 1.65 [1.40, 1.94]                   | <0.001  | 1.3 [0.7, 1.8]                                  | <0.001  |
| Arthroscopic surgery for knee osteoarthritis | 1.42 [1.18, 1.71]                   | <0.001  | 0.8 [0.4, 1.3]                                  | <0.001  |
| Spinal injections for low back pain          | 1.41 [1.19, 1.66]                   | <0.001  | 0.3 [0.1, 0.4]                                  | 0.003   |

a. Estimates are presented for a 1% change in commercial low-value care rates in a Medicaid patient's PCSA of residence. Models adjusted for patient age, sex, urban or rural residence, and Charlson comorbidity index.

b. Risk differences were calculated from logistic regression models, as the change in predicted probability of receiving low-value care for the average qualifying Medicaid patient, when the commercial rate of low-value care in their PCSA of residence increases by 1%.

**eTable 8a:** Full logistic regression model output for the association between insurance type and low-value care for the measure: Imaging for non-specific lower back pain

| Covariate                      | Coefficient | Standard Error | p- value |
|--------------------------------|-------------|----------------|----------|
| (Intercept)                    | -1.983      | 0.021          | <0.001   |
| Medicaid coverage <sup>1</sup> | 0.452       | 0.022          | <0.001   |
| Age (years) <sup>2</sup>       |             |                |          |
| 35-49                          | 0.060       | 0.023          | 0.010    |
| 50-64                          | 0.320       | 0.023          | <0.001   |
| Male sex                       | 0.141       | 0.017          | <0.001   |
| Rural residence <sup>3</sup>   | 0.156       | 0.018          | <0.001   |
| Charlson Comorbidity Index     | 0.068       | 0.006          | <0.001   |

1. Reference is commercial insurance
2. Reference is 18-34
3. Reference is urban residence

**eTable 8b:** Full logistic regression model output for the association between insurance type and low-value care for the measure: Head imaging for uncomplicated headache

| Covariate                      | Coefficient | Standard Error | p- value |
|--------------------------------|-------------|----------------|----------|
| (Intercept)                    | -2.334      | 0.022          | <0.001   |
| Medicaid coverage <sup>1</sup> | 0.517       | 0.023          | <0.001   |
| Age (years) <sup>2</sup>       |             |                |          |
| 35-49                          | -0.015      | 0.025          | 0.546    |
| 50-64                          | 0.048       | 0.027          | 0.081    |
| Male sex                       | 0.442       | 0.023          | <0.001   |
| Rural residence <sup>3</sup>   | -0.021      | 0.022          | 0.360    |
| Charlson Comorbidity Index     | 0.192       | 0.007          | <0.001   |

1. Reference is commercial insurance
2. Reference is 18-34
3. Reference is urban residence

**eTable 8c:** Full logistic regression model output for the association between insurance type and low-value care for the measure: Head imaging for syncope

| Covariate                      | Coefficient | Standard Error | p- value |
|--------------------------------|-------------|----------------|----------|
| (Intercept)                    | -2.501      | 0.074          | <0.001   |
| Medicaid coverage <sup>1</sup> | 0.416       | 0.072          | <0.001   |
| Age (years) <sup>2</sup>       |             |                |          |
| 35-49                          | 0.092       | 0.090          | 0.307    |
| 50-64                          | 0.215       | 0.085          | 0.011    |
| Male sex                       | -0.118      | 0.068          | 0.083    |
| Rural residence <sup>3</sup>   | 0.080       | 0.069          | 0.243    |
| Charlson Comorbidity Index     | 0.096       | 0.015          | <0.001   |

1. Reference is commercial insurance
2. Reference is 18-34
3. Reference is urban residence

**eTable 8d:** Full logistic regression model output for the association between insurance type and low-value care for the measure: Imaging for diagnosis of plantar fasciitis

| Covariate                      | Coefficient | Standard Error | p- value |
|--------------------------------|-------------|----------------|----------|
| (Intercept)                    | -1.667      | 0.072          | <0.001   |
| Medicaid coverage <sup>1</sup> | -0.498      | 0.091          | <0.001   |
| Age (years) <sup>2</sup>       |             |                |          |
| 35-49                          | 0.096       | 0.078          | 0.216    |
| 50-64                          | 0.210       | 0.076          | 0.006    |
| Male sex                       | -0.107      | 0.050          | 0.032    |
| Rural residence <sup>3</sup>   | 0.239       | 0.051          | <0.001   |
| Health conditions              | -0.009      | 0.021          | 0.669    |

1. Reference is commercial insurance
2. Reference is 18-34
3. Reference is urban residence



**eTable 8e:** Full logistic regression model output for the association between insurance type and low-value care for the measure: Total or Free T3 tests for patients with hypothyroidism

| Covariate                      | Coefficient | Standard Error | p- value |
|--------------------------------|-------------|----------------|----------|
| (Intercept)                    | -1.384      | 0.046          | <0.001   |
| Medicaid coverage <sup>1</sup> | -0.533      | 0.049          | <0.001   |
| Age (years) <sup>2</sup>       |             |                |          |
| 35-49                          | 0.044       | 0.050          | 0.380    |
| 50-64                          | -0.290      | 0.048          | <0.001   |
| Male sex                       | -0.500      | 0.044          | <0.001   |
| Rural residence <sup>3</sup>   | 0.074       | 0.031          | 0.016    |
| Charlson Comorbidity Index     | -0.064      | 0.011          | <0.001   |

1. Reference is commercial insurance

2. Reference is 18-34

3. Reference is urban residence

**eTable 8f:** Full model output for the association between insurance type and low-value care for the measure: Pre-operative chest radiography

| Covariate                      | Coefficient | Standard Error | p- value |
|--------------------------------|-------------|----------------|----------|
| (Intercept)                    | -4.105      | 0.073          | <0.001   |
| Medicaid coverage <sup>1</sup> | 0.728       | 0.051          | <0.001   |
| Age (years) <sup>2</sup>       |             |                |          |
| 35-49                          | 0.354       | 0.079          | <0.001   |
| 50-64                          | 0.884       | 0.073          | <0.001   |
| Male sex                       | 0.070       | 0.045          | 0.116    |
| Rural residence <sup>3</sup>   | 0.281       | 0.045          | <0.001   |
| Charlson Comorbidity Index     | 0.210       | 0.008          | <0.001   |

1. Reference is commercial insurance

2. Reference is 18-34

3. Reference is urban residence

**eTable 8g:** Full logistic regression model output for the association between insurance type and low-value care for the measure: Abdomen CT combined studies

| Covariate                      | Coefficient | Standard Error | p- value |
|--------------------------------|-------------|----------------|----------|
| (Intercept)                    | -3.461      | 0.065          | <0.001   |
| Medicaid coverage <sup>1</sup> | -0.299      | 0.049          | <0.001   |
| Age (years) <sup>2</sup>       |             |                |          |
| 35-49                          | 0.622       | 0.071          | <0.001   |
| 50-64                          | 1.046       | 0.067          | <0.001   |
| Male sex                       | 0.200       | 0.041          | <0.001   |
| Rural residence <sup>3</sup>   | -0.029      | 0.043          | 0.493    |
| Charlson Comorbidity Index     | 0.056       | 0.007          | <0.001   |

1. Reference is commercial insurance

2. Reference is 18-34

3. Reference is urban residence

**eTable 8h:** Full logistic regression model output for the association between insurance type and low-value care for the measure: Simultaneous brain and sinus CT

| Covariate                      | Coefficient | Standard Error | p- value |
|--------------------------------|-------------|----------------|----------|
| (Intercept)                    | -2.907      | 0.091          | <0.001   |
| Medicaid coverage <sup>1</sup> | 0.273       | 0.084          | 0.001    |
| Age (years) <sup>2</sup>       |             |                |          |
| 35-49                          | -0.207      | 0.100          | 0.040    |
| 50-64                          | -0.320      | 0.103          | 0.002    |
| Male sex                       | 0.147       | 0.082          | 0.072    |
| Rural residence <sup>3</sup>   | -0.134      | 0.086          | 0.120    |
| Charlson Comorbidity Index     | -0.173      | 0.027          | <0.001   |

1. Reference is commercial insurance

2. Reference is 18-34

3. Reference is urban residence

**eTable 8i:** Full logistic regression model output for the association between insurance type and low-value care for the measure: CT for acute uncomplicated rhinosinusitis

| Covariate                      | Coefficient | Standard Error | p- value |
|--------------------------------|-------------|----------------|----------|
| (Intercept)                    | -3.811      | 0.055          | <0.001   |
| Medicaid coverage <sup>1</sup> | 0.043       | 0.065          | 0.512    |
| Age (years) <sup>2</sup>       |             |                |          |
| 35-49                          | 0.270       | 0.061          | <0.001   |
| 50-64                          | 0.417       | 0.062          | <0.001   |
| Male sex                       | 0.211       | 0.046          | <0.001   |
| Rural residence <sup>3</sup>   | -0.223      | 0.050          | <0.001   |
| Health conditions              | 0.071       | 0.016          | <0.001   |

1. Reference is commercial insurance
2. Reference is 18-34
3. Reference is urban residence

**eTable 8j:** Full logistic regression model output for the association between insurance type and low-value care for the measure: Arthroscopic surgery for knee osteoarthritis

| Covariate                      | Coefficient | Standard Error | p- value |
|--------------------------------|-------------|----------------|----------|
| (Intercept)                    | -2.516      | 0.096          | <0.001   |
| Medicaid coverage <sup>1</sup> | -0.582      | 0.091          | <0.001   |
| Age (years) <sup>2</sup>       |             |                |          |
| 35-49                          | -0.069      | 0.104          | 0.507    |
| 50-64                          | -0.606      | 0.098          | <0.001   |
| Male sex                       | 0.127       | 0.058          | 0.029    |
| Rural residence <sup>3</sup>   | -0.060      | 0.061          | 0.331    |
| Charlson Comorbidity Index     | -0.105      | 0.026          | <0.001   |

1. Reference is commercial insurance
2. Reference is 18-34
3. Reference is urban residence

**eTable 8k:** Full logistic regression model output for the association between insurance type and low-value care for the measure: Thorax CT combined studies

| Covariate                      | Coefficient | Standard Error | p- value |
|--------------------------------|-------------|----------------|----------|
| (Intercept)                    | -4.310      | 0.250          | <0.001   |
| Medicaid coverage <sup>1</sup> | 0.547       | 0.160          | 0.001    |
| Age (years) <sup>2</sup>       |             |                |          |
| 35-49                          | 0.152       | 0.258          | 0.557    |
| 50-64                          | -0.112      | 0.244          | 0.647    |
| Male sex                       | 0.225       | 0.152          | 0.140    |
| Rural residence <sup>3</sup>   | -0.318      | 0.166          | 0.056    |
| Charlson Comorbidity Index     | -0.030      | 0.024          | 0.209    |

1. Reference is commercial insurance
2. Reference is 18-34
3. Reference is urban residence

**eTable 8l:** Full logistic regression model output for the association between insurance type and low-value care for the measure: Pre-operative echocardiography

| Covariate                      | Coefficient | Standard Error | p- value |
|--------------------------------|-------------|----------------|----------|
| (Intercept)                    | -6.101      | 0.210          | <0.001   |
| Medicaid coverage <sup>1</sup> | 0.427       | 0.137          | 0.002    |
| Age (years) <sup>2</sup>       |             |                |          |
| 35-49                          | 0.290       | 0.234          | 0.215    |
| 50-64                          | 0.873       | 0.215          | <0.001   |
| Male sex                       | -0.217      | 0.124          | 0.079    |
| Rural residence <sup>3</sup>   | 0.076       | 0.122          | 0.533    |
| Charlson Comorbidity Index     | 0.253       | 0.016          | <0.001   |

1. Reference is commercial insurance
2. Reference is 18-34
3. Reference is urban residence

**eTable 8m:** Full logistic regression model output for the association between insurance type and low-value care for the measure: Spinal injections for low back pain

| Covariate                      | Coefficient | Standard Error | p- value |
|--------------------------------|-------------|----------------|----------|
| (Intercept)                    | -4.663      | 0.058          | <0.001   |
| Medicaid coverage <sup>1</sup> | -0.991      | 0.066          | <0.001   |
| Age (years) <sup>2</sup>       |             |                |          |
| 35-49                          | 0.598       | 0.063          | <0.001   |
| 50-64                          | 1.012       | 0.060          | <0.001   |
| Male sex                       | 0.000       | 0.038          | 0.995    |
| Rural residence <sup>3</sup>   | 0.228       | 0.039          | <0.001   |
| Charlson Comorbidity Index     | 0.084       | 0.012          | <0.001   |

1. Reference is commercial insurance

2. Reference is 18-34

3. Reference is urban residence

**eTable 8n:** Full logistic regression model output for the association between insurance type and low-value care for the measure: Pre-operative stress testing

| Covariate                      | Coefficient | Standard Error | p- value |
|--------------------------------|-------------|----------------|----------|
| (Intercept)                    | -7.520      | 0.394          | <0.001   |
| Medicaid coverage <sup>1</sup> | 0.823       | 0.188          | <0.001   |
| Age (years) <sup>2</sup>       |             |                |          |
| 35-49                          | 1.154       | 0.416          | 0.005    |
| 50-64                          | 1.935       | 0.395          | <0.001   |
| Male sex                       | 0.063       | 0.165          | 0.702    |
| Rural residence <sup>3</sup>   | -0.068      | 0.171          | 0.692    |
| Charlson Comorbidity Index     | 0.113       | 0.029          | <0.001   |

1. Reference is commercial insurance

2. Reference is 18-34

3. Reference is urban residence

**eTable 8o:** Full logistic regression model output for the association between insurance type and low-value care for the measure: Pre-operative pulmonary function testing

| Covariate                      | Coefficient | Standard Error | p- value |
|--------------------------------|-------------|----------------|----------|
| (Intercept)                    | -6.265      | 0.255          | <0.001   |
| Medicaid coverage <sup>1</sup> | 0.554       | 0.206          | 0.007    |
| Age (years) <sup>2</sup>       |             |                |          |
| 35-49                          | -0.290      | 0.304          | 0.341    |
| 50-64                          | 0.284       | 0.265          | 0.284    |
| Male sex                       | 0.045       | 0.178          | 0.798    |
| Rural residence <sup>3</sup>   | -0.433      | 0.202          | 0.032    |
| Charlson Comorbidity Index     | 0.190       | 0.027          | <0.001   |

1. Reference is commercial insurance
2. Reference is 18-34
3. Reference is urban residence

**eTable 8p:** Full logistic regression model output for the association between insurance type and low-value care for the measure: Electroencephalogram for headaches

| Covariate                      | Coefficient | Standard Error | p- value |
|--------------------------------|-------------|----------------|----------|
| (Intercept)                    | -7.150      | 0.213          | <0.001   |
| Medicaid coverage <sup>1</sup> | 0.755       | 0.196          | <0.001   |
| Age (years) <sup>2</sup>       |             |                |          |
| 35-49                          | 0.127       | 0.225          | 0.572    |
| 50-64                          | 0.065       | 0.245          | 0.789    |
| Male sex                       | 0.478       | 0.193          | 0.013    |
| Rural residence <sup>3</sup>   | 0.426       | 0.186          | 0.022    |
| Charlson Comorbidity Index     | 0.111       | 0.048          | 0.021    |

1. Reference is commercial insurance
2. Reference is 18-34
3. Reference is urban residence

## eAppendix: Methods and Results

### **Evaluating the relationship between insurance and any type of low-value care**

To examine the association between insurance type and receiving any of the 16 low-value services, we conducted aggregate analyses, similar to those done in other studies<sup>1</sup>. Like models for individual measures, the outcome of interest was a binary variable indicating whether a patient received low-value care. The primary independent variable was an indicator of Medicaid vs. commercial insurance coverage. Covariates included patient-level demographics, rural or urban residence, and Charlson comorbidity Index. While models for individual measures considered only patients who qualified for the measure of interest, in aggregate analyses we pooled patient-level data for all low-value service types, included measure-level fixed effects to adjust for low-value care qualifying type, and used patient-level clustered standard errors to account for multiple observations of patients. The risk difference associated with insurance type was calculated from the resulting logistic regression model, as the difference in marginal effects for the average qualifying patient. Results of this analysis showed that overall, Medicaid patients were more likely than commercial patients to receive low-value care during 2013, although the effect was quite small (risk difference= 0.57%, 95% CI=0.50%-0.65%).

### **Evaluating the relationship between insurance and low-value care across subgroups of services**

#### *Higher versus lower cost services*

We used cost classifications created by Schwartz and colleagues for 13 of the 16 low-value care measures.<sup>2</sup> For the remaining three measures that were not previously classified, we assigned services as lower (<\$150) or higher (≥\$150) cost, similar to price ranges used for previously classified measures. Prices were estimated using national Medicare payment rates from the American Medical Association<sup>3</sup>, for relevant procedures. Eleven of the sixteen measures were classified as higher cost, and the remaining five measures were classified as lower cost. A summary of cost classifications is presented in **eTable 2**.

We then conducted logistic regression to examine the relationship between insurance type and low-value care, across strata of price category. Similar to the models described above, this analysis used aggregate data that included patient-level information for all measures. However in this case, fixed effects for low-value care qualifying type were replaced with an indicator of whether the measure was classified as higher or lower cost. Stratified results of this analysis are presented in **eTable 4**.

### *More versus less likely to occur in the ED*

To classify measures that were more likely versus less likely to occur in the ED, we used a combination of assessments by clinicians, and information about the measure specifications. More specifically, we first collected assessments about the likelihood of each service occurring in the ED from two different practicing emergency department physicians, and a co-author who is a physician medical student. In addition, we used information about the measures, where applicable, to aid in classifications. For example, technical specifications for the measure “Preoperative Chest Radiography” explicitly exclude any services that occur in an emergency setting. Three of the sixteen measures were classified as more likely to occur in the ED, with the remaining thirteen measures classified as less likely to occur in the ED. A summary of ED classifications is presented in **eTable 2**.

We then conducted logistic regression to examine the relationship between insurance type and low-value care, across strata of ED category. Similar to the models described above, this analysis used aggregate data that included patient-level information for all measures. However in this case, fixed effects for low-value care qualifying type were replaced with an indicator of whether the measure was classified as more or less likely to occur in the emergency department. Stratified results of this analysis are presented in **eTable 5**.

### **Examining the influence of local practice patterns: detailed analytic approach**

To examine the potential influence of local practice patterns, we assessed the association between receipt of low-value care among Medicaid patients, and the rate of low-value care among commercially insured patients residing in the same PCSA. This analysis required five steps:

1. We restricted the analysis to low-value care services with a minimum of 150 instances observed among Medicaid patients during 2013. Eleven of sixteen services met this requirement. This threshold was used to ensure adequate statistical power for small area geographic analyses.



2. For each service, we computed “smoothed” PCSA-level rates of low-value care for the commercial population. “Smoothed” rates were generated from hierarchical mixed-effects models using standard Fay-Herriot small area estimation techniques.<sup>4,5</sup> The hierarchical mixed effects models were run as generalized linear-mixed effect models containing a global fixed intercept and a PCSA-level random intercept term. The model took the following functional form:

$$Y_{ij} \sim \text{Bernoulli}(p_j)$$
$$\text{logit}(p_j) = \alpha + \omega_j$$
$$\omega_j \sim N(0, \sigma_\alpha^2)$$

$Y_{ij}$  represents receipt of low-value care for patient  $i$  in PCSA  $j$

$p_j$  represents the rate of low-value care in region  $j$

$\alpha$  represents the intercept of the logistic regression model. It is also the logit of the state low-value care rate due to the lack of other covariates in the model

$\omega_j$  represents the random PCSA-level intercept

$\sigma_\alpha^2$  represents the variance between PCSA level rates of low-value care

3. The resulting smoothed estimate is a weighted average of the raw PCSA rate and the statewide rate, where the weight given to each PCSA rate relative to the weight given to the state rate is based on the precision of the PCSA estimate, which is a function of population size<sup>6</sup>. In the absence of smoothing, PCSAs with small populations tend to have very noisy estimates which are less representative of the actual rate of low-value care. Smoothing addresses this problem by bringing rates for PCSAs with small populations closer to the state mean. This approach is similar to methodology used in other studies, to produce smoothed rates of health outcomes or utilization.
4. We restricted subsequent analyses to the Medicaid population. Patient-level logistic regression was used to test the association between receipt of low-value care among Medicaid patients, and the smoothed commercial rate of low-value care in their PCSA of residence.
5. Using marginal effects, we computed the change in predicted probability of receiving low-value care for an average Medicaid patient when commercial low-value care rates in their PCSA of residence increased by 1%.

**eFigure:** Distribution of raw low-value care rates in PCSAs, by insurance type

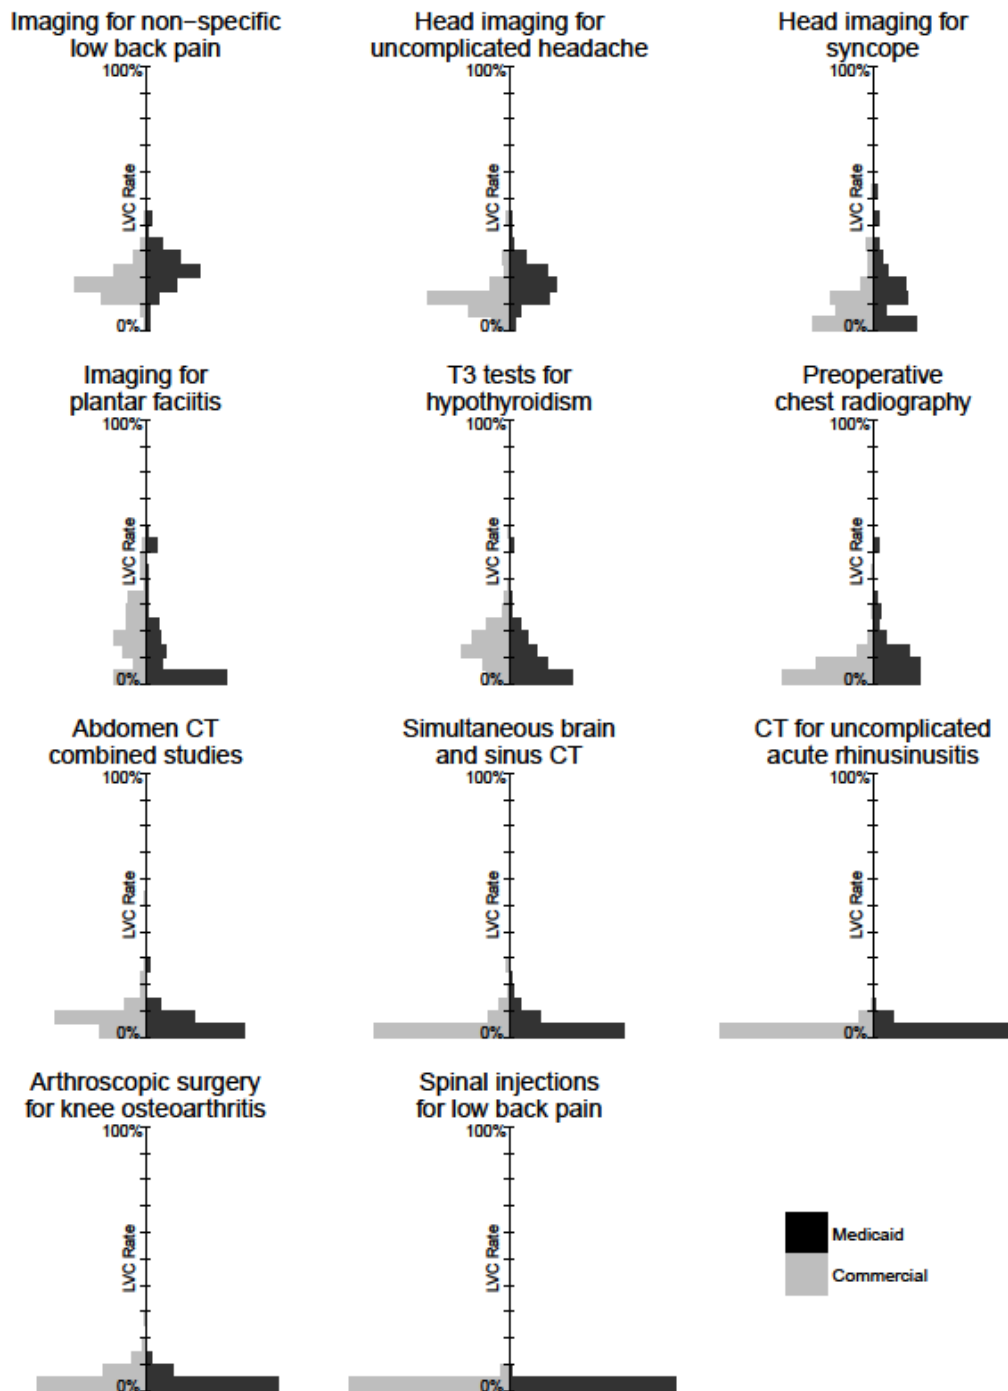

Notes: displayed low-value services are those that met the threshold for inclusion in geographic analyses. Rates are unsmoothed.

## eReferences

1. Song Z, Safran DG, Landon BE, et al. Health care spending and quality in year 1 of the alternative quality contract. *N Engl J Med*. 2011;365(10):909-918. doi:10.1056/NEJMsa1101416.
2. Schwartz AL, Chernew ME, Landon BE, McWilliams JM. Changes in Low-Value Services in Year 1 of the Medicare Pioneer Accountable Care Organization Program. *JAMA Intern Med*. 2015;175(11):1815-1825. doi:10.1001/jamainternmed.2015.4525.
3. American Medical Association. cpt Code/Relative Value Search. <https://ocm.ama-assn.org/OCM/CPTRelativeValueSearch.do?submitButton=accept>.
4. Rao JNK. *Small Area Estimation*. Wiley & Sons; 2003.
5. Bates D, Maechler M, Bolker B, Walker S. Fitting Linear Mixed-Effects Models Using lme4. *J Stat Softw*. 2015;67(1):1-48. doi:doi:10.18637/jss.v067.i01.
6. Gelman A, Hill J. *Data Analysis Using Regression and Multilevel/Hierarchical Models*. Cambridge University Press; 2007.
